# Supplementary material for: A Comparative Analysis of Reactive Müller Glia Gene Expression After Light Damage and microRNA-Depleted Müller Glia—Focus on microRNAs
Source: PubMed Central journal article supplement (PMC7891663; doi:10.3389/fcell.2020.620459), 2021-01-26
Supplement: Data_Sheet_2.pdf [file Data_Sheet_2.pdf]

## Supplementary Tables

Supplementary Table 1: Genotyping Primers

| Gene name                | Forward sequence (5' to 3')   | Reverse sequence (3' to 5') |
|--------------------------|-------------------------------|-----------------------------|
| <i>Rbp1Cre transgene</i> | CAA GTG TGA GAG ACA GCA TTG   | TCC TTA GCG CCG TAA ATC AA  |
| <i>tdTomato wildtype</i> | AAG GGA GCT GCA GTG GAG TA    | CCG AAA ATC TGT GGG AAG TC  |
| <i>tdTomato mutant</i>   | CTG TTC CTG TAC GGC ATG G     | GGC ATT AAA GCA GCG TAT CC  |
| <i>RPE65</i>             | CAC TGT GGT CTC TGC TAT CTT C | GGT GCA GTT CCA CTT CAG TT  |

**Supplementary Table 2: Primary Antibodies**

| <b>Antibody</b>                      | <b>Concentration</b> | <b>Company, Catalog #</b>     |
|--------------------------------------|----------------------|-------------------------------|
| rat anti RFP (tdTomato)              | 1:500                | Antibodies online, ABIN334653 |
| mouse anti glutamine synthetase (GS) | 1:200                | Millipore, MAB302             |
| rabbit anti Sox9                     | 1:1000               | Millipore, AB5535             |
| rabbit anti GFAP                     | 1:1000               | Dako, Z033401-2               |
| goat anti Otx2                       | 1:250                | R&D Systems, AF1979           |

**Supplementary Table 3. Glial gene expression in normal and light damaged Müller glia (Microarray).**

| Gene Symbol | Undamaged control log2 relative expression | 7 days after light damage log2 relative expression | Fold change light damage versus control |
|-------------|--------------------------------------------|----------------------------------------------------|-----------------------------------------|
| Glul        | 13.84596                                   | 13.06892                                           | -0.78                                   |
| Rlbp1       | 12.38061                                   | 11.62174                                           | -0.76                                   |
| Aqp4        | 11.80212                                   | 11.42555                                           | -0.38                                   |
| Vim         | 11.88869                                   | 13.19273                                           | 1.30                                    |
| Slc1a3      | 12.14886                                   | 12.14886                                           | 0.00                                    |
| Sox9        | 10.11897                                   | 10.73825                                           | 0.62                                    |
| Sox2        | 10.94028                                   | 11.58379                                           | 0.64                                    |
| Gfap        | 6.282722                                   | 10.5111                                            | 4.23                                    |

**Supplementary Table 4: Expression levels (decline) of the Müller glia (MG) miRNAs (cutoff 3000 counts) after light damage (LD), in normal adult wild type and Dicer-CKO MG (Nanostring).**

| Probe Name      | normal MG (counts) | MG Light damage (counts) | Dicer-CKO MG (counts) | % decline after LD | % decline after cKO | Accession #  |
|-----------------|--------------------|--------------------------|-----------------------|--------------------|---------------------|--------------|
| mmu-miR-204     | 285706             | 51963                    | 30438                 | -82                | -89                 | MIMAT0000237 |
| mmu-miR-125b-5p | 109596             | 19063                    | 18202                 | -83                | -83                 | MIMAT0000136 |
| mmu-miR-9       | 75416              | 38870                    | 18100                 | -48                | -76                 | MIMAT0000142 |
| mmu-miR-181a    | 48829              | 19965                    | 8300                  | -59                | -83                 | MIMAT0000210 |
| mmu-let-7c      | 26178              | 9888                     | 9984                  | -62                | -62                 | MIMAT0000523 |
| mmu-miR-99a     | 19815              | 9626                     | 2284                  | -51                | -88                 | MIMAT0000131 |
| mmu-let-7b      | 18043              | 11425                    | 3875                  | -37                | -79                 | MIMAT0000522 |
| mmu-let-7g      | 15643              | 13871                    | 6952                  | -11                | -56                 | MIMAT0000121 |
| mmu-miR-30c     | 13955              | 7419                     | 3296                  | -47                | -76                 | MIMAT0000514 |
| mmu-let-7d      | 13294              | 6634                     | 3557                  | -50                | -73                 | MIMAT0000383 |
| mmu-miR-135a    | 12833              | 11626                    | 4865                  | -9                 | -62                 | MIMAT0000147 |
| mmu-let-7a      | 8129               | 3648                     | 2704                  | -55                | -67                 | MIMAT0000521 |
| mmu-miR-16      | 7260               | 2732                     | 3358                  | -62                | -54                 | MIMAT0000527 |
| mmu-miR-125a-5p | 5639               | 1275                     | 661                   | -77                | -88                 | MIMAT0000135 |
| mmu-miR-100     | 5626               | 1507                     | 524                   | -73                | -91                 | MIMAT0000655 |
| mmu-miR-1944    | 5024               | 2622                     | 3535                  | -48                | -30                 | MIMAT0009409 |

|                |      |      |      |     |     |              |
|----------------|------|------|------|-----|-----|--------------|
| mmu-miR-22     | 4916 | 4438 | 1236 | -10 | -75 | MIMAT0000531 |
| mmu-miR-30d    | 4676 | 1910 | 909  | -59 | -81 | MIMAT0000515 |
| mmu-let-7e     | 3790 | 1521 | 984  | -60 | -74 | MIMAT0000524 |
| mmu-miR-335-5p | 3329 | 1702 | 1311 | -49 | -61 | MIMAT0000766 |
| mmu-miR-23a    | 3327 | 1796 | 1515 | -46 | -54 | MIMAT0000532 |

**Supplementary Table 5: Expression levels (increase) of the Müller glia (MG) miRNAs after light damage (LD, cutoff 5000 counts after LD), in normal adult wild type and Dicer-CKO MG (Nanostring).**

| Probe Name | normal MG (counts) | MG Light damage (counts) | Dicer-CKO MG (counts) | Fold increase after LD | Fold increase cKO | Accession #  |
|------------|--------------------|--------------------------|-----------------------|------------------------|-------------------|--------------|
| miR-720**  | 23904              | 172827                   | 10983                 | 7.2                    | 0.5               | MIMAT0003484 |
| miR-29a    | 8716               | 10969                    | 4052                  | 1.3                    | 0.5               | MIMAT0000535 |
| miR-29b    | 1748               | 7515                     | 2005                  | 4.3                    | 1.1               | MIMAT0000127 |
| miR-124    | 1354               | 5506                     | 12106                 | 4.1                    | 8.9               | MIMAT0000134 |
| miR-1937a  | 1094               | 6129                     | 1298                  | 5.6                    | 1.2               | MIMAT0009401 |

\*\* The sequence annotated as miR-720 is likely to be a fragment of a tRNA, and therefore is removed from the miRBase database ([Schopman et al., 2010](#)).

**Supplementary Table 6: Expression levels of Argonaute2-bound miRNAs in whole mouse retinas (data set from the Natoli lab (Chu-Tan et al., 2020)).**

| Probe Name  | Log2CPM light damage | Probe Name | Log2CPM light damage |
|-------------|----------------------|------------|----------------------|
| miR-204-5p  | 11.17327             | miR-1944   | -                    |
| miR-125b-5p | 13.76099             | miR-22-3p  | 8.905651             |
| miR-9-5p    | 4.631367             | miR-30d-5p | 7.862324             |
| miR-181a-5p | 12.86331             | let-7e-5p  | 7.14469              |
| let-7c-5p   | 9.809521             | miR-335-5p | 7.864721             |
| miR-99a-5p  | 9.097142             | miR-23a-5p | 3.497926             |
| let-7b-5p   | 9.04164              | miR-720    | -                    |
| let-7g-5p   | 10.04702             | miR-29a-5p | 9.068966             |
| miR-30c-5p  | 10.32144             | miR-29b-3p | 13.17489             |
| let-7d-5p   | 8.755262             | miR-124-3p | 19.58201             |
| miR-135a-5p | 9.069131             | miR-1937a  | -                    |
| let-7a-5p   | 5.292606             | miR-183-5p | 14.30006             |
| miR-16-5p   | 8.524132             | miR-182-3p | 7.636908             |
| miR-125a-5p | 13.37126             | miR-96-5p  | 10.51531             |
| miR-100-5p  | 6.124773             | miR-22-3p  | 8.905651             |

**Supplementary Table 7: Top 50 genes upregulated after light damage (Microarray).**

| <b>Gene</b> | <b>Undamaged control log2 relative expression</b> | <b>Light Damage log2 relative expression</b> | <b>Fold change light damage versus control</b> |
|-------------|---------------------------------------------------|----------------------------------------------|------------------------------------------------|
| Myc         | 5.546965                                          | 10.58033                                     | 5.03                                           |
| Ednrb       | 7.38606                                           | 12.32283                                     | 4.94                                           |
| Serpina3n   | 7.027112                                          | 11.8461                                      | 4.82                                           |
| Cxcl10      | 5.769135                                          | 10.57737                                     | 4.81                                           |
| Lcn2        | 7.960248                                          | 12.71421                                     | 4.75                                           |
| Gfap        | 6.282722                                          | 10.5111                                      | 4.23                                           |
| Timp1       | 6.105936                                          | 10.3307                                      | 4.22                                           |
| Gadd45b     | 7.56354                                           | 11.64912                                     | 4.09                                           |
| Ifi203      | 4.298881                                          | 8.316713                                     | 4.02                                           |
| Anxa2       | 5.3885                                            | 9.285599                                     | 3.90                                           |
| Steap4      | 6.341545                                          | 10.20562                                     | 3.86                                           |
| Mt2         | 8.264072                                          | 12.11129                                     | 3.85                                           |
| Klf6        | 8.065225                                          | 11.78304                                     | 3.72                                           |
| Ccl2        | 6.402283                                          | 10.11604                                     | 3.71                                           |
| S100a6      | 6.641229                                          | 10.29619                                     | 3.65                                           |
| Tubb6       | 6.196977                                          | 9.784472                                     | 3.59                                           |
| Gbp2        | 6.841433                                          | 10.37846                                     | 3.54                                           |



|         |          |          |      |
|---------|----------|----------|------|
| Hmox1   | 6.483181 | 10.01682 | 3.53 |
| Acsl5   | 5.492249 | 9.016914 | 3.52 |
| Emp1    | 6.499097 | 10.00783 | 3.51 |
| Ch11    | 7.436919 | 10.9089  | 3.47 |
| Maff    | 5.317573 | 8.760696 | 3.44 |
| Penk    | 6.833021 | 10.2276  | 3.39 |
| Akap12  | 7.17374  | 10.51307 | 3.34 |
| Rnd3    | 7.763508 | 11.06458 | 3.30 |
| Il1rap  | 6.830734 | 10.12385 | 3.29 |
| Nupr1   | 7.160269 | 10.37722 | 3.22 |
| Bace2   | 6.047527 | 9.25269  | 3.21 |
| Rsad2   | 6.317559 | 9.501802 | 3.18 |
| Ptgs2   | 5.797745 | 8.972202 | 3.17 |
| Aldh1a3 | 6.87675  | 10.044   | 3.17 |
| Atf3    | 8.045691 | 11.1855  | 3.14 |
| Cdh13   | 7.377244 | 10.51443 | 3.14 |
| Lgals1  | 7.972818 | 11.10459 | 3.13 |
| Fosl1   | 6.344384 | 9.40595  | 3.06 |
| Tagln2  | 5.956065 | 8.991003 | 3.03 |
| Phlda1  | 6.358819 | 9.392575 | 3.03 |
| Gap43   | 8.421201 | 11.44139 | 3.02 |

|         |          |          |      |
|---------|----------|----------|------|
| Ifitm3  | 8.424528 | 11.38966 | 2.97 |
| Lif     | 6.396519 | 9.344319 | 2.95 |
| Slc7a11 | 7.8706   | 10.81352 | 2.94 |
| Osmr    | 8.618423 | 11.55899 | 2.94 |
| Ahnak2  | 5.90714  | 8.836987 | 2.93 |
| Cd44    | 7.835063 | 10.75019 | 2.92 |
| Layn    | 5.905998 | 8.788326 | 2.88 |
| Kitl    | 5.588583 | 8.422109 | 2.83 |
| Nes     | 6.868566 | 9.689172 | 2.82 |
| Trp53   | 6.800496 | 9.614729 | 2.81 |
| Hbegf   | 7.970807 | 10.77976 | 2.81 |
| Gas5    | 7.477266 | 10.28387 | 2.81 |
| Egr2    | 7.160723 | 9.940983 | 2.78 |

**Supplementary Table 8. Gene expression (Microarray) of genes reported to be expressed in light damaged retinas or MG of light damaged retinas**

| <b>Gene Symbol</b> | <b>Description</b>                                                         | <b>Undamaged control log2 relative expression</b> | <b>Light Damage log2 relative expression</b> | <b>Fold change light damage versus control</b> |
|--------------------|----------------------------------------------------------------------------|---------------------------------------------------|----------------------------------------------|------------------------------------------------|
| Bcl2               | B cell leukemia/lymphoma 2                                                 | 6.964325                                          | 7.039897                                     | 0.1                                            |
| Ctsd               | cathepsin D                                                                | 11.26174                                          | 11.74302                                     | 0.5                                            |
| Kcnj10             | potassium inwardly-rectifying channel, subfamily J, member 10              | 10.01217                                          | 10.01217                                     | 0.0                                            |
| Ngfr p75           | nerve growth factor receptor (TNFR superfamily, member 16)                 | 9.180977                                          | 10.22241                                     | 1.0                                            |
| Fgf2               | fibroblast growth factor 2                                                 | 7.965034                                          | 9.540471                                     | 1.6                                            |
| Ntf3               | neurotrophin 3                                                             | 6.209656                                          | 6.530434                                     | 0.3                                            |
| Ntrk3              | neurotrophic tyrosine kinase, receptor, type 3                             | 6.347559                                          | 5.990314                                     | -0.4                                           |
| Pcna               | proliferating cell nuclear antigen                                         | 10.28271                                          | 10.64208                                     | 0.4                                            |
| Mki67              | antigen identified by monoclonal antibody Ki 67                            | 4.799019                                          | 4.799019                                     | 0.0                                            |
| Ccnd1              | cyclin D1                                                                  | 9.439362                                          | 11.09856                                     | 1.7                                            |
| Cntf               | ciliary neurotrophic factor receptor                                       | 10.44431                                          | 10.44431                                     | 0.0                                            |
| Gdnf               | glial cell line derived neurotrophic factor                                | 6.911917                                          | 7.776315                                     | 0.9                                            |
| Aqp1               | aquaporin 1                                                                | 9.807625                                          | 7.814171                                     | -2.0                                           |
| Fos                | FBJ osteosarcoma oncogene                                                  | 11.96496                                          | 12.49366                                     | 0.5                                            |
| Nfkb1              | nuclear factor of kappa light polypeptide gene enhancer in B cells 1, p105 | 8.410229                                          | 9.486856                                     | 1.1                                            |

## Supplementary Material\_ Tables

|       |                                                                |          |          |      |
|-------|----------------------------------------------------------------|----------|----------|------|
| Tnf   | tumor necrosis factor                                          | 6.7052   | 6.7052   | 0.0  |
| Ccl2  | chemokine (C-C motif) ligand 2                                 | 6.402283 | 10.11604 | 3.7  |
| Crb1  | crumbs family member 1, photoreceptor morphogenesis associated | 11.92124 | 10.88318 | -1.0 |
| Ace2  | angiotensin I converting enzyme (peptidyl-dipeptidase A) 2     | 4.17806  | 4.17806  | 0.0  |
| Ncan  | neurocan                                                       | 7.059061 | 7.436745 | 0.4  |
| Vcan  | versican                                                       | 5.366831 | 7.601713 | 2.2  |
| Bcan  | brevican                                                       | 6.602848 | 6.602848 | 0.0  |
| Cd44  | CD44 antigen                                                   | 7.835063 | 10.75019 | 2.9  |
| Rac1  | RAS-related C3 botulinum substrate 1                           | 10.58856 | 11.14308 | 0.6  |
| Rac2  | RAS-related C3 botulinum substrate 2                           | 6.715644 | 6.64817  | -0.1 |
| Rac3  | RAS-related C3 botulinum substrate 3                           | 6.947626 | 7.163431 | 0.2  |
| Rhoa  | ras homolog gene family, member A                              | 11.11479 | 11.76252 | 0.6  |
| Rhob  | ras homolog gene family, member B                              | 9.169951 | 10.23754 | 0.6  |
| Rhoc  | ras homolog gene family, member C                              | 8.911922 | 9.589165 | 1.1  |
| Gpx1  | glutathione peroxidase 1                                       | 7.744192 | 8.224051 | 0.5  |
| Il6st | interleukin 6 signal transducer                                | 10.98721 | 11.81941 | 0.8  |
| Lifr  | leukemia inhibitory factor receptor                            | 9.5482   | 9.000968 | -0.5 |
| Cntfr | ciliary neurotrophic factor receptor                           | 10.44431 | 10.44431 | 0.0  |
| Stat3 | signal transducer and activator of transcription 3             | 9.444607 | 11.28477 | 1.8  |

|        |                                                     |          |          |     |
|--------|-----------------------------------------------------|----------|----------|-----|
| Lif    | leukemia inhibitory factor                          | 6.396519 | 9.344319 | 2.9 |
| Mt1    | metallothionein 1                                   | 10.30838 | 12.41494 | 2.1 |
| Mt2    | metallothionein 2                                   | 8.264072 | 12.11129 | 3.8 |
| Cp     | ceruloplasmin                                       | 12.69996 | 13.53588 | 0.8 |
| Lcn2   | lipocalin 2                                         | 7.960248 | 12.71421 | 4.8 |
| Chi311 | Chitinase 3 Like 1                                  | 9.969642 | 10.76591 | 3.7 |
| Bag3   | BCL2-associated athanogene 3                        | 8.030416 | 9.648602 | 0.8 |
| Bag1   | BCL2-associated athanogene 1                        | 8.359955 | 8.655867 | 1.6 |
| S100a1 | S100 calcium binding protein A1                     | 8.86525  | 10.03048 | 0.3 |
| Clic4  | chloride intracellular channel 4<br>(mitochondrial) | 9.118465 | 10.49558 | 1.2 |
| Clic1  | chloride intracellular channel 1                    | 7.760585 | 10.41751 | 1.4 |
| Hdac11 | histone deacetylase 11                              | 8.182041 | 7.539239 | 2.7 |

**Supplementary Table 9: Fold change of 21 genes in Müller glia after LD and Dicer deletion.** \*genes with >2.7 (LD) and >1.4 fold increase (cKO) are in bold.

| Gene           | Undamaged control log2 relative expression (Microarray) | Light Damage log2 relative expression (Microarray) | Fold change light damage versus control | Wild type (RNA-Seq) log2CPM | Dicer-cKO (RNA-Seq) log2CPM | Fold change cKO versus wild type |
|----------------|---------------------------------------------------------|----------------------------------------------------|-----------------------------------------|-----------------------------|-----------------------------|----------------------------------|
| <b>Maff</b>    | <b>5.31757</b>                                          | <b>8.7607</b>                                      | <b>3.44</b>                             | <b>6.18847</b>              | <b>8.76958</b>              | <b>2.58</b>                      |
| <b>Atf3</b>    | <b>8.04569</b>                                          | <b>11.1855</b>                                     | <b>3.14</b>                             | <b>6.83319</b>              | <b>8.98196</b>              | <b>2.15</b>                      |
| Irf1           | 7.89435                                                 | 9.26844                                            | 1.37                                    | 6.65689                     | 8.79824                     | 2.14                             |
| Arc            | 7.99967                                                 | 9.42568                                            | 1.43                                    | 6.93241                     | 8.75483                     | 1.82                             |
| <b>Egr2</b>    | <b>7.16072</b>                                          | <b>9.94098</b>                                     | <b>2.78</b>                             | <b>7.02422</b>              | <b>8.8231</b>               | <b>1.80</b>                      |
| Rrs1           | 7.41351                                                 | 8.87402                                            | 1.46                                    | 4.62288                     | 6.37159                     | 1.75                             |
| <b>Gadd45b</b> | <b>7.56354</b>                                          | <b>11.6491</b>                                     | <b>4.09</b>                             | <b>4.78525</b>              | <b>6.4322</b>               | <b>1.65</b>                      |
| Fosl2          | 7.10696                                                 | 8.63265                                            | 1.53                                    | 5.19051                     | 6.54333                     | 1.35                             |
| Csrnp1         | 7.04901                                                 | 8.99495                                            | 1.95                                    | 6.24975                     | 7.43475                     | 1.19                             |
| Cebpb          | 7.8281                                                  | 9.37884                                            | 1.55                                    | 4.73147                     | 5.78673                     | 1.06                             |
| Lmna           | 7.01591                                                 | 8.57848                                            | 1.56                                    | 4.51125                     | 5.56106                     | 1.05                             |
| C4b            | 7.77481                                                 | 9.44723                                            | 1.67                                    | 4.94628                     | 5.9242                      | 0.98                             |
| Epha2          | 7.82134                                                 | 9.26089                                            | 1.44                                    | 5.8779                      | 6.7657                      | 0.89                             |
| Mt2            | 8.26407                                                 | 12.1113                                            | 3.85                                    | 6.93133                     | 7.81361                     | 0.88                             |
| Nfkbia         | 8.25089                                                 | 10.232                                             | 1.98                                    | 5.69714                     | 6.54235                     | 0.85                             |
| Gfap           | 6.28272                                                 | 10.5111                                            | 4.23                                    | 4.37759                     | 5.20687                     | 0.83                             |

|       |         |         |      |         |         |      |
|-------|---------|---------|------|---------|---------|------|
| H2-D1 | 8.34902 | 9.89489 | 1.55 | 5.82285 | 6.62164 | 0.80 |
| Myh9  | 8.34219 | 9.65764 | 1.32 | 6.46277 | 7.24567 | 0.78 |
| Hbegf | 8.97967 | 9.60301 | 2.81 | 4.24778 | 5.01641 | 0.77 |
| Nr4a1 | 7.97081 | 10.7798 | 1.49 | 9.49231 | 10.2245 | 0.73 |
| Sbno2 | 6.99263 | 9.6866  | 2.69 | 5.40557 | 6.11851 | 0.71 |
